# Supplementary material for: PD-L1 is an activation-independent marker of brown adipocytes
Source: PubMed Central journal article supplement (PMC5608754; doi:10.1038/s41467-017-00799-8), 2017-09-21
Supplement: 41467_2017_799_MOESM2_ESM.pdf [file 41467_2017_799_MOESM2_ESM.pdf]

## Description of Additional Supplementary Files

File Name: Supplementary Movie 1

Description: This 3D representation corresponds to the still image presented in Figure 1J:  $^{18}\text{F}$ - B3 image from a WT mouse injected with subcutaneous B16 melanoma.

File Name: Supplementary Movie 2

Description:  $^{18}\text{F}$ -FDG PET-CT 3D projection image acquired as on naïve C57BL/6 mouse.

File Name: Supplementary Movie 3

Description:  $^{18}\text{F}$ -FDG PET-CT 3D projection image acquired as on a C57BL/6 mice treated with 10 mg/kg of the  $\beta$ -adrenergic agonist CL316243 given i.p. 45 minutes before injection of radiolabel.

File Name: Supplementary Movie 4

Description:  $^{64}\text{Cu}$ -B3 PET-CT 3D projection image acquired as on naïve C57BL/6 mouse.

File Name: Supplementary Movie 5

Description:  $^{64}\text{Cu}$ -B3 PET-CT 3D projection image acquired as on a C57BL/6 mice treated with 10 mg/kg of the  $\beta$ -adrenergic agonist CL316243 given i.p. 45 minutes before injection of radiolabel.
